# Supplementary material for: Stable J-aggregation enabled dual photoacoustic and fluorescence nanoparticles for intraoperative cancer imaging
Source: Royal Society of Chemistry journal article supplement (doi:10.1039/c5nr08165c), 2015-12-24
Supplement: c5nr08165c1.pdf [file c5nr08165c1.pdf]

## SUPPORTING INFORMATION

# Stable J-aggregation enabled dual photoacoustic and fluorescence nanoparticles for intraoperative cancer imaging

Mojdeh Shakiba,<sup>a,b</sup> Kenneth K. Ng,<sup>a,c</sup> Elizabeth Huynh,<sup>a,b</sup> Harley Chan,<sup>a,e</sup> Danielle M. Charron,<sup>a,c</sup> Juan Chen,<sup>a</sup> Nidal Muhanna,<sup>a</sup> F. Stuart Foster,<sup>b,d</sup> Brian C. Wilson<sup>a,b</sup> and Gang Zheng<sup>a,b,c\*</sup>

<sup>a</sup>Princess Margaret Cancer Centre and Techna Institute, University Health Network, Toronto, ON, Canada

<sup>b</sup>Department of Medical Biophysics, University of Toronto, Toronto, ON, Canada

<sup>c</sup>Institute of Biomaterials and Biomedical Engineering, Toronto, ON, Canada

<sup>d</sup>Sunnybrook Research Institute, Toronto, ON, Canada

<sup>e</sup>Guided Therapeutics, TECHNA Institute, University Health Network, Toronto, ON, Canada

\*All correspondence can be sent to gang.zheng@uhnres.utoronto.ca

### Supporting Figures

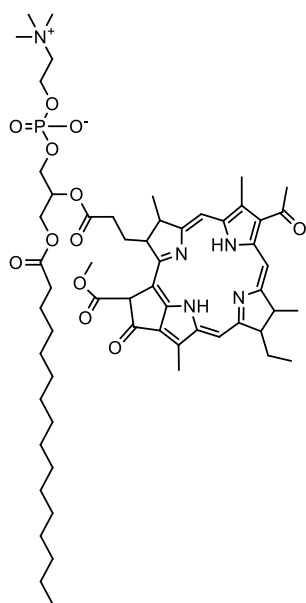

Figure S1 Chemical structure of bacteriopheophorbide-lipid

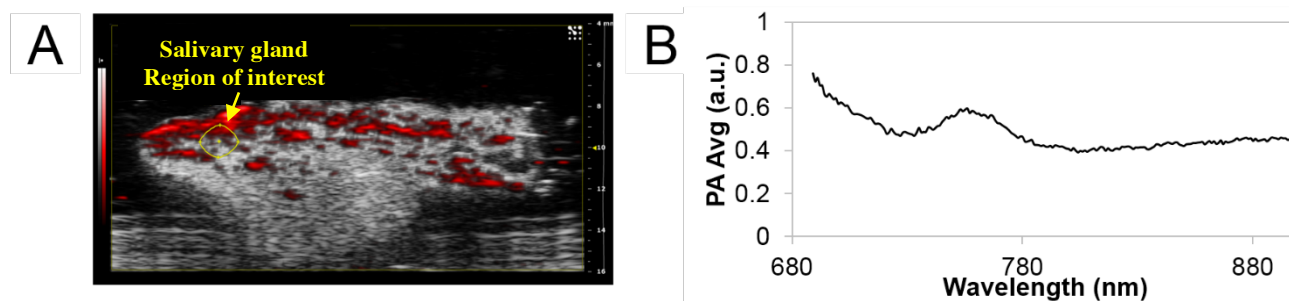

Figure S2. PA imaging of untreated salivary gland tissue (A) PA image of salivary gland. (B) PA spectrum of region associated with A.
